# Supplementary material for: Genomic features and evolution of the conditionally dispensable chromosome in the tangerine pathotype of Alternaria alternata
Source: PubMed Central journal article supplement — Mol Plant Pathol. 2019 Jul 11;20(10):1425–38. doi: 10.1111/mpp.12848 (PMC6792136; doi:10.1111/mpp.12848), 2019-07-11

- Taxonomy**
- Leotiomycetes
  - Sordariomycetes
  - Eurotiomycetes
  - Dothideomycetes
  - other\_Pezizomycotina
  - Basidiomycota
  - Saccharomycotina
  - other\_Fungi
  - Oomycetes
  - other\_Eukaryota
  - Bacteria
  - Archaea
  - Viruses

Fig S2

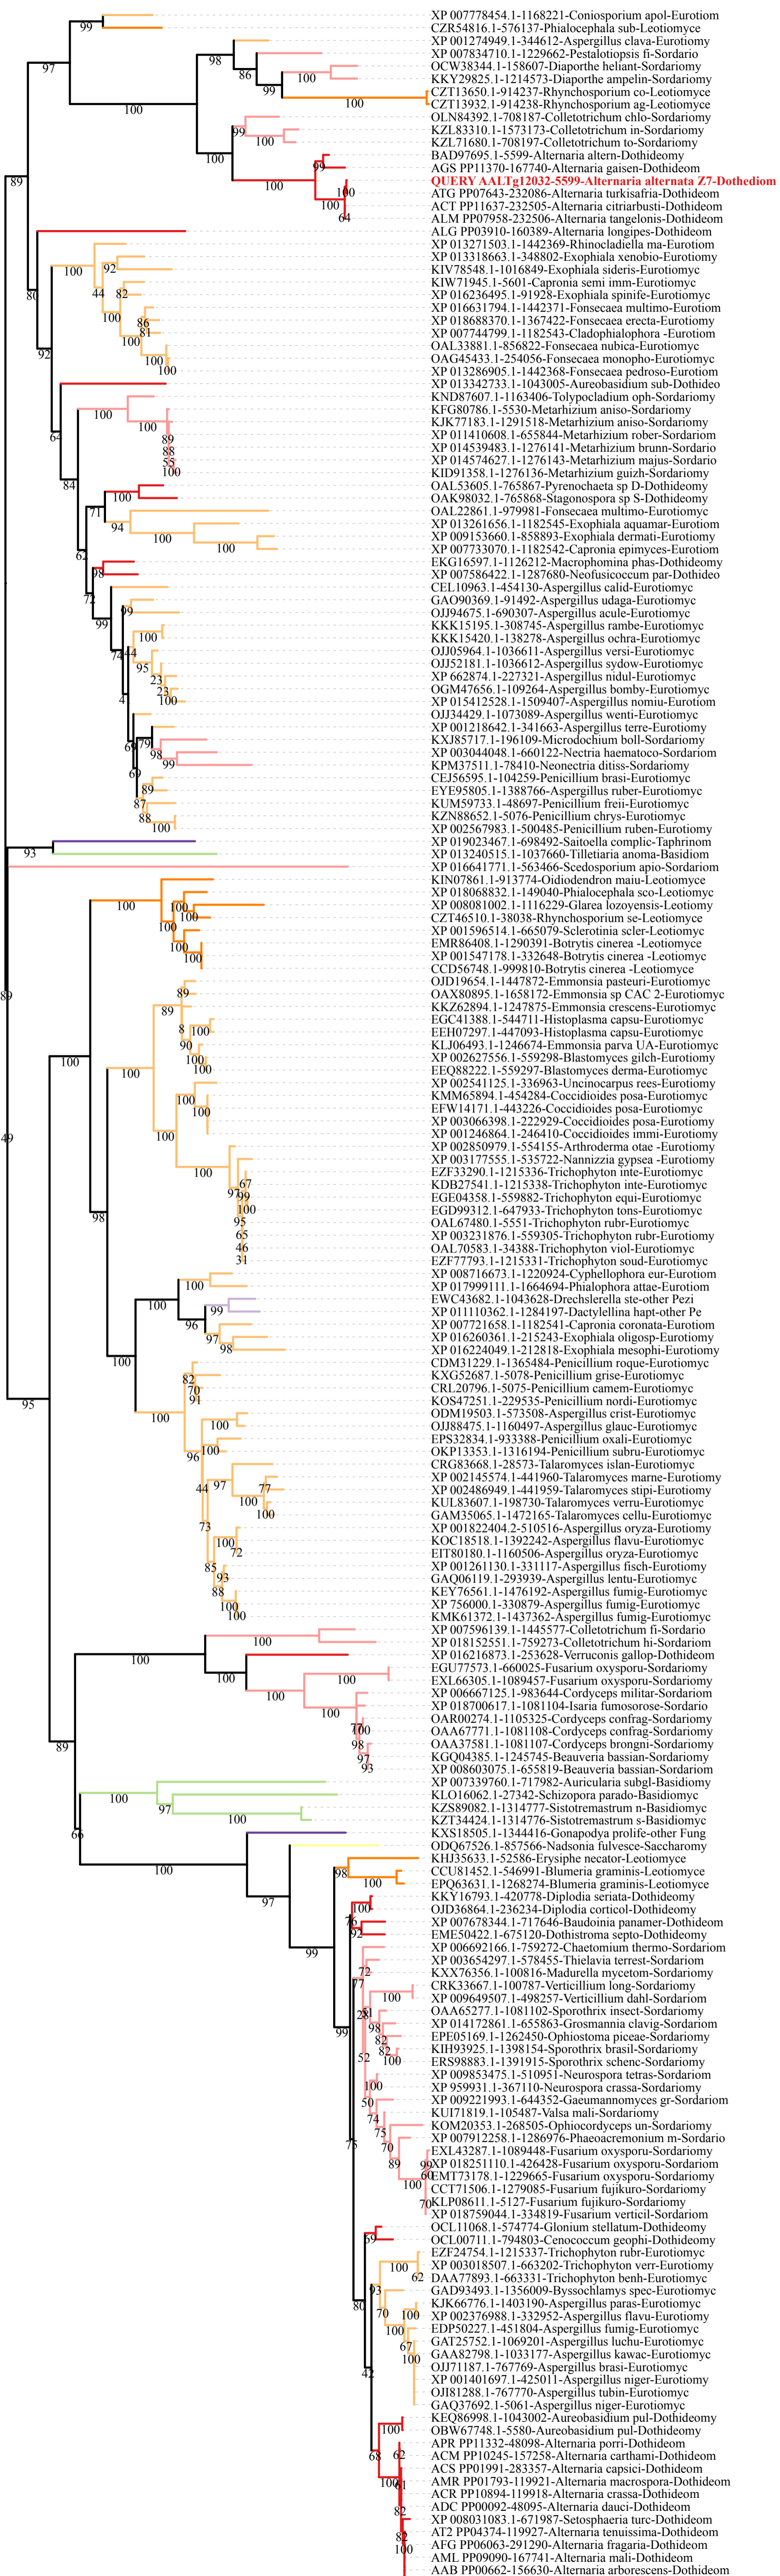

Supplement: MPP-20-1425-s004.pdf [file MPP-20-1425-s004.pdf]
