# Supplementary figures and images for: Genomic features and evolution of the conditionally dispensable chromosome in the tangerine pathotype of Alternaria alternata
Source: PubMed Central journal article supplement — Mol Plant Pathol. 2019 Jul 11;20(10):1425–38. doi: 10.1111/mpp.12848 (PMC6792136; doi:10.1111/mpp.12848), 2019-07-11

**Fig S1**

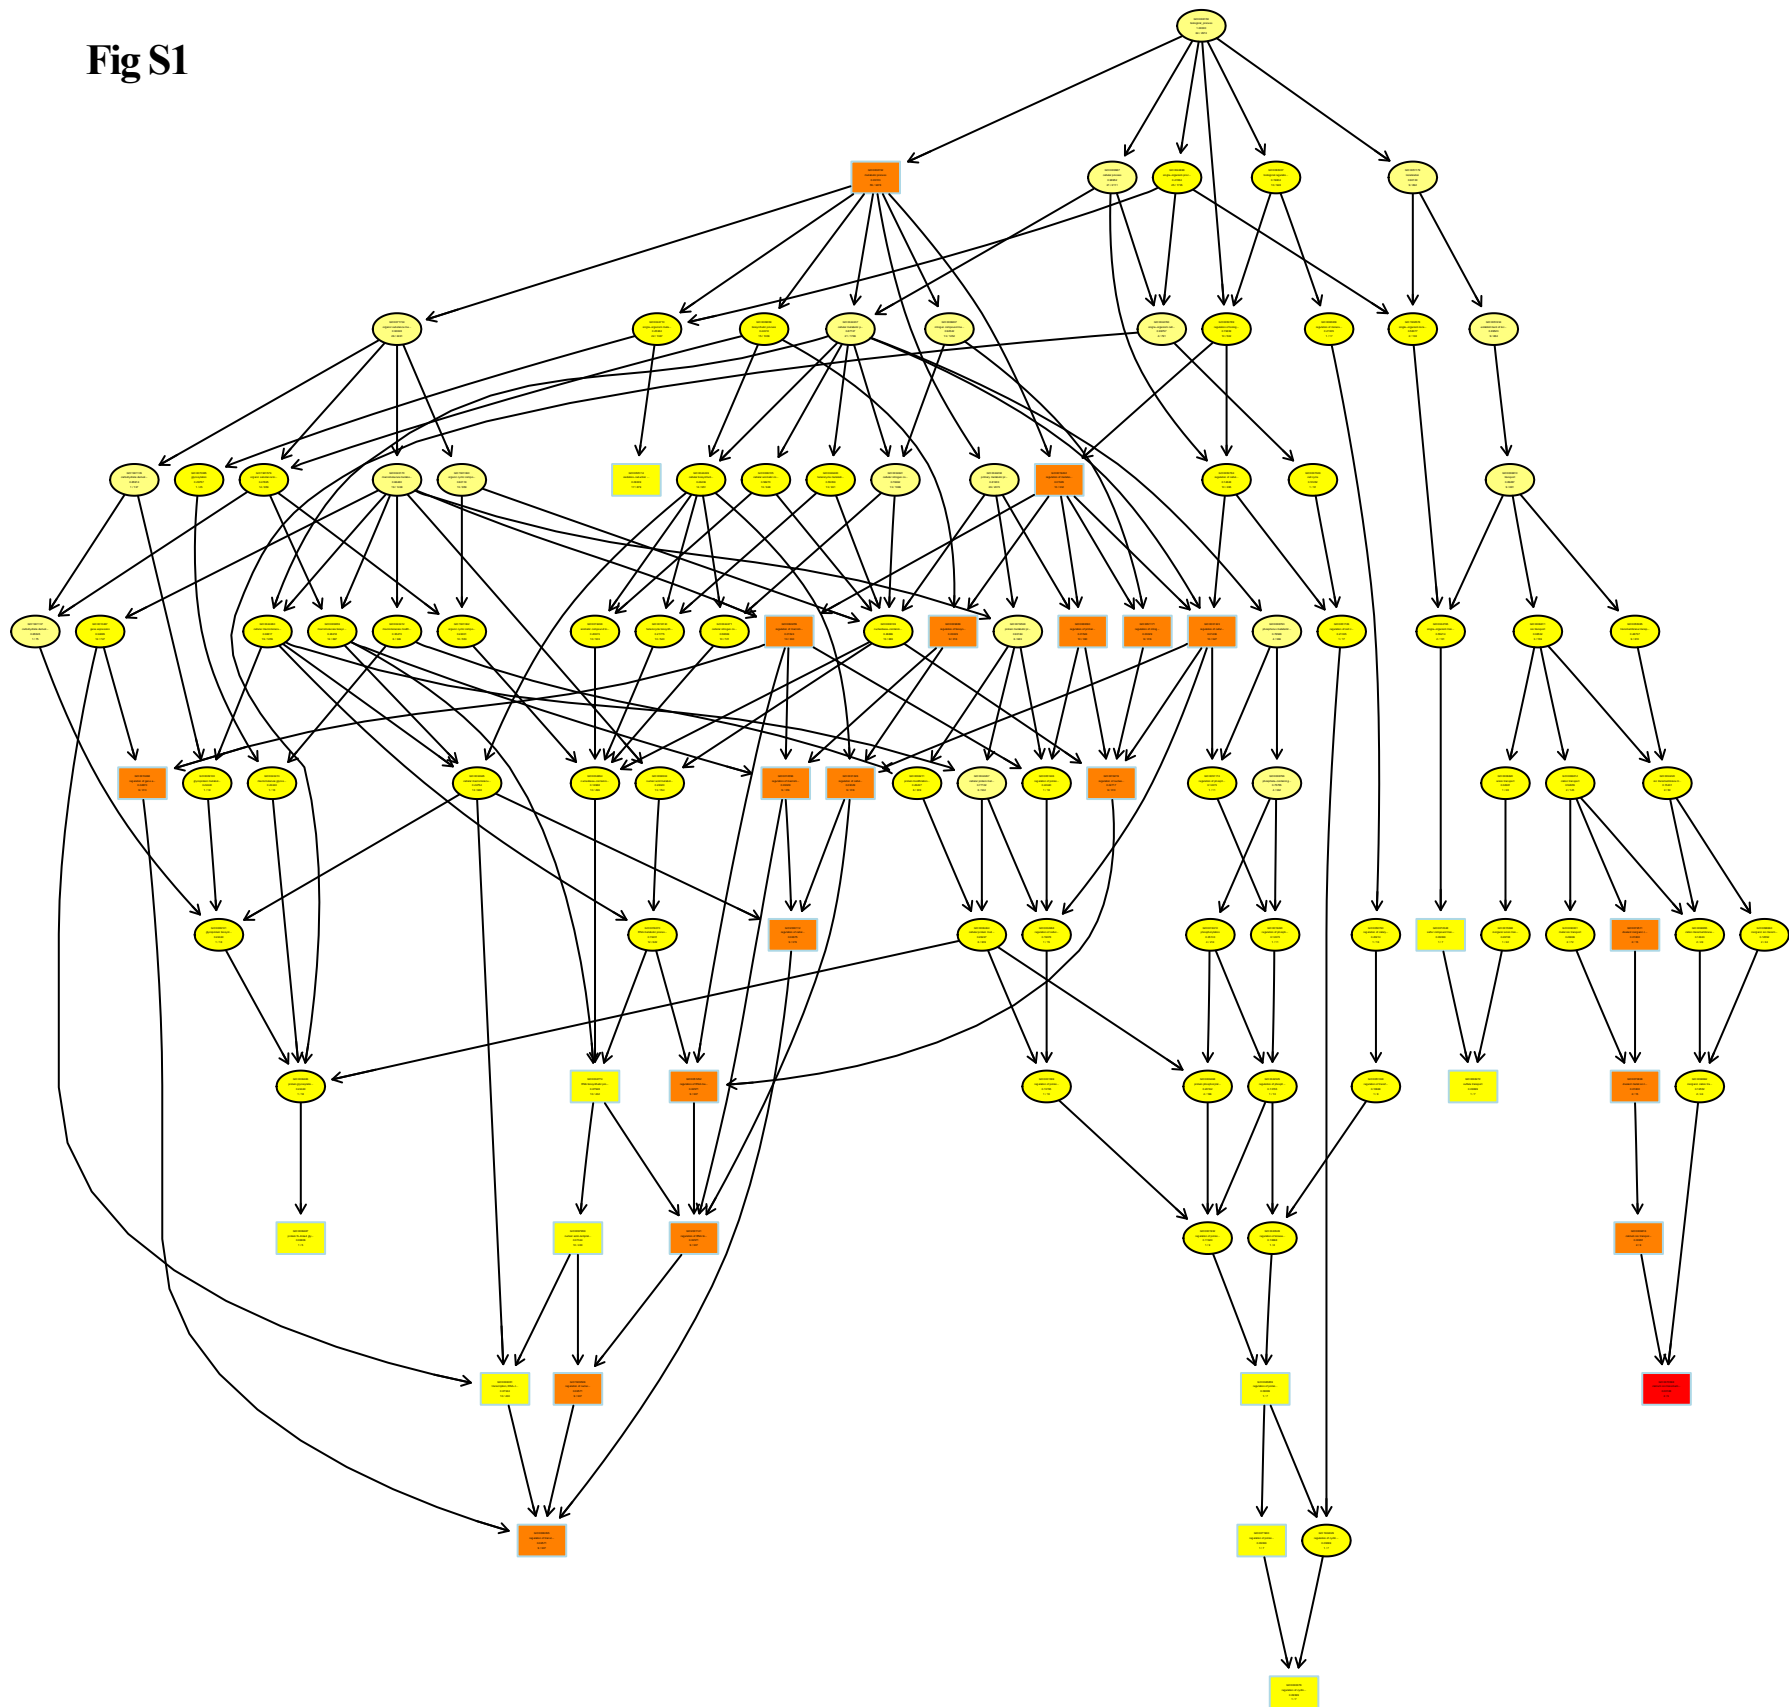

Supplement: MPP-20-1425-s001.pdf [file MPP-20-1425-s001.pdf]

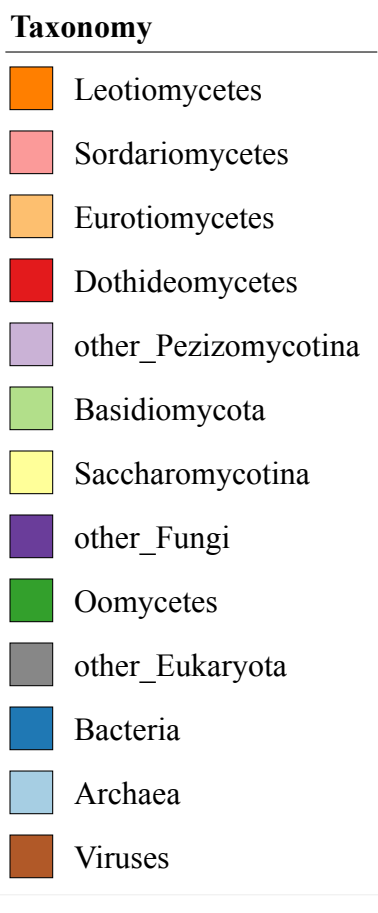

Fig S3

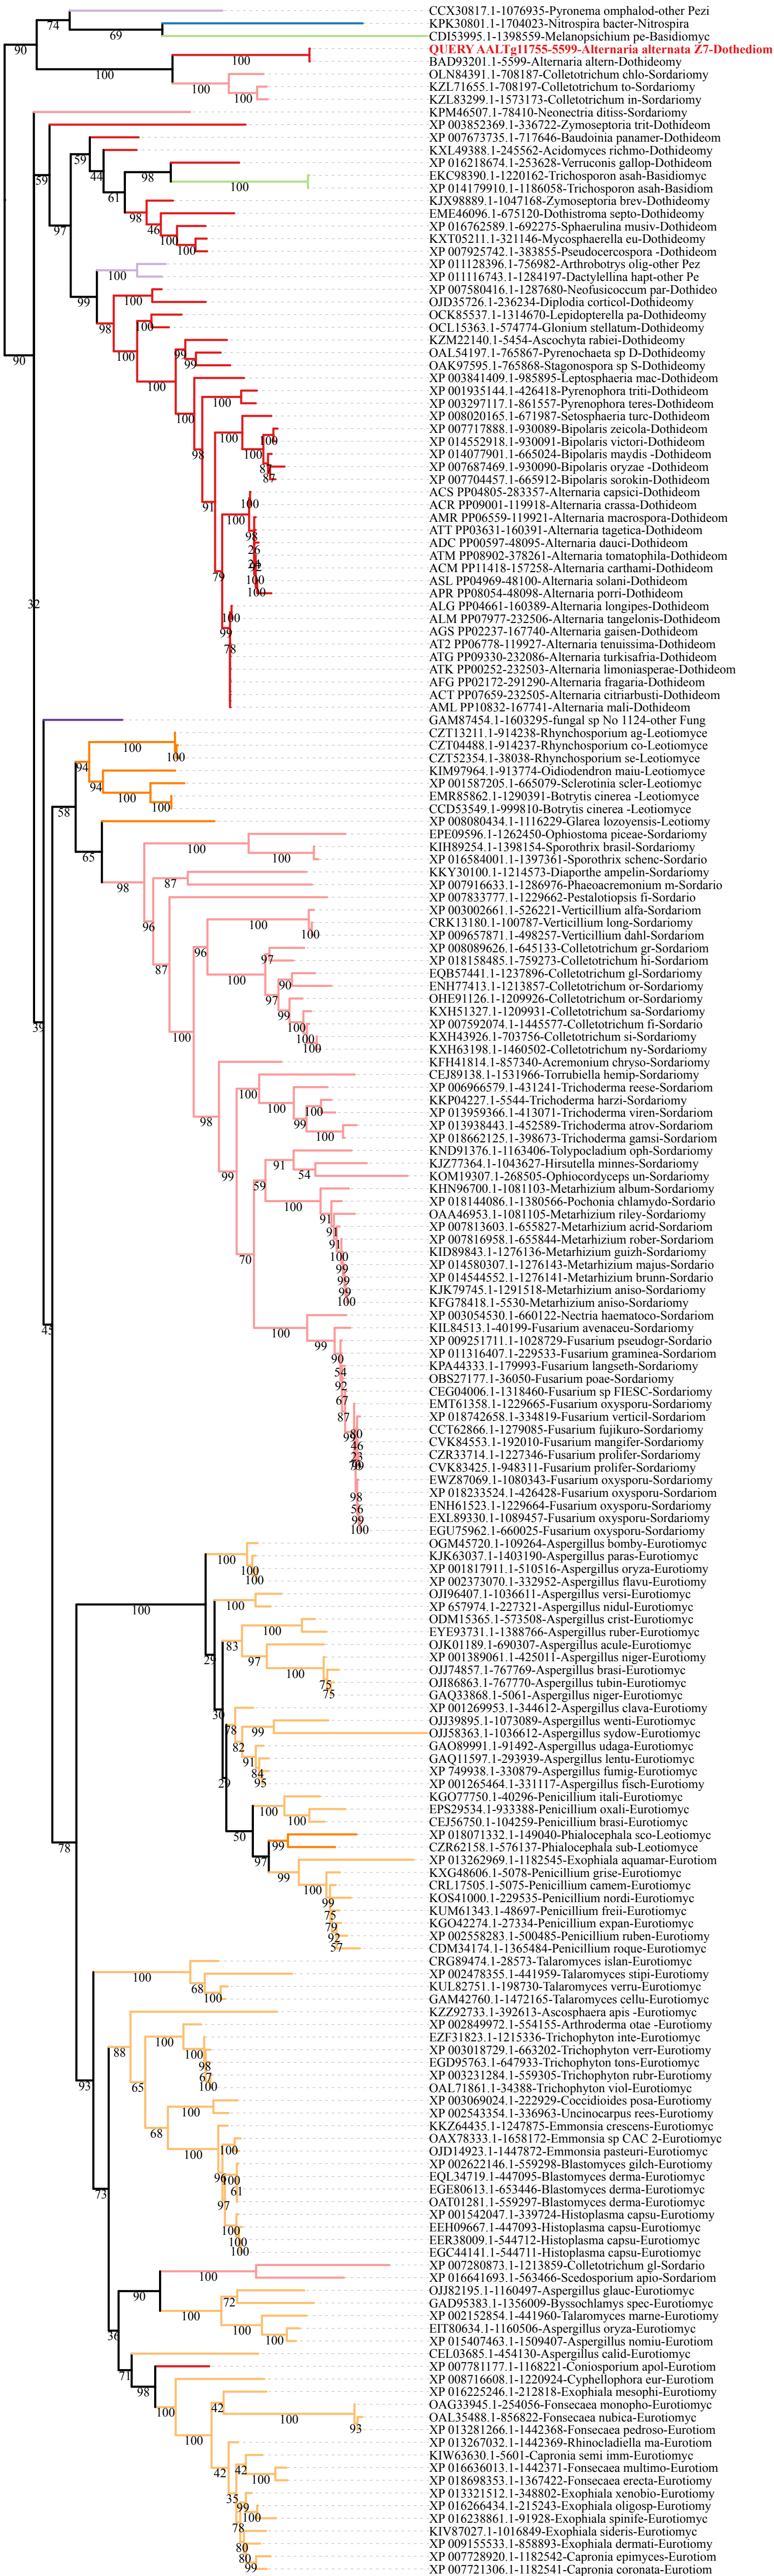

Supplement: MPP-20-1425-s005.pdf [file MPP-20-1425-s005.pdf]

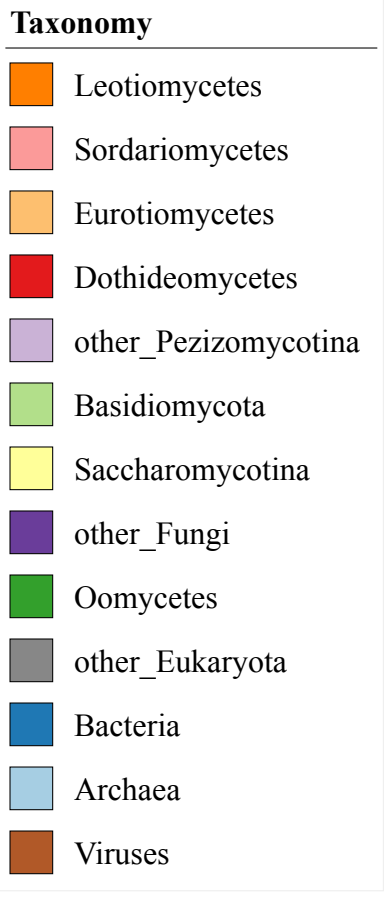

Fig S4

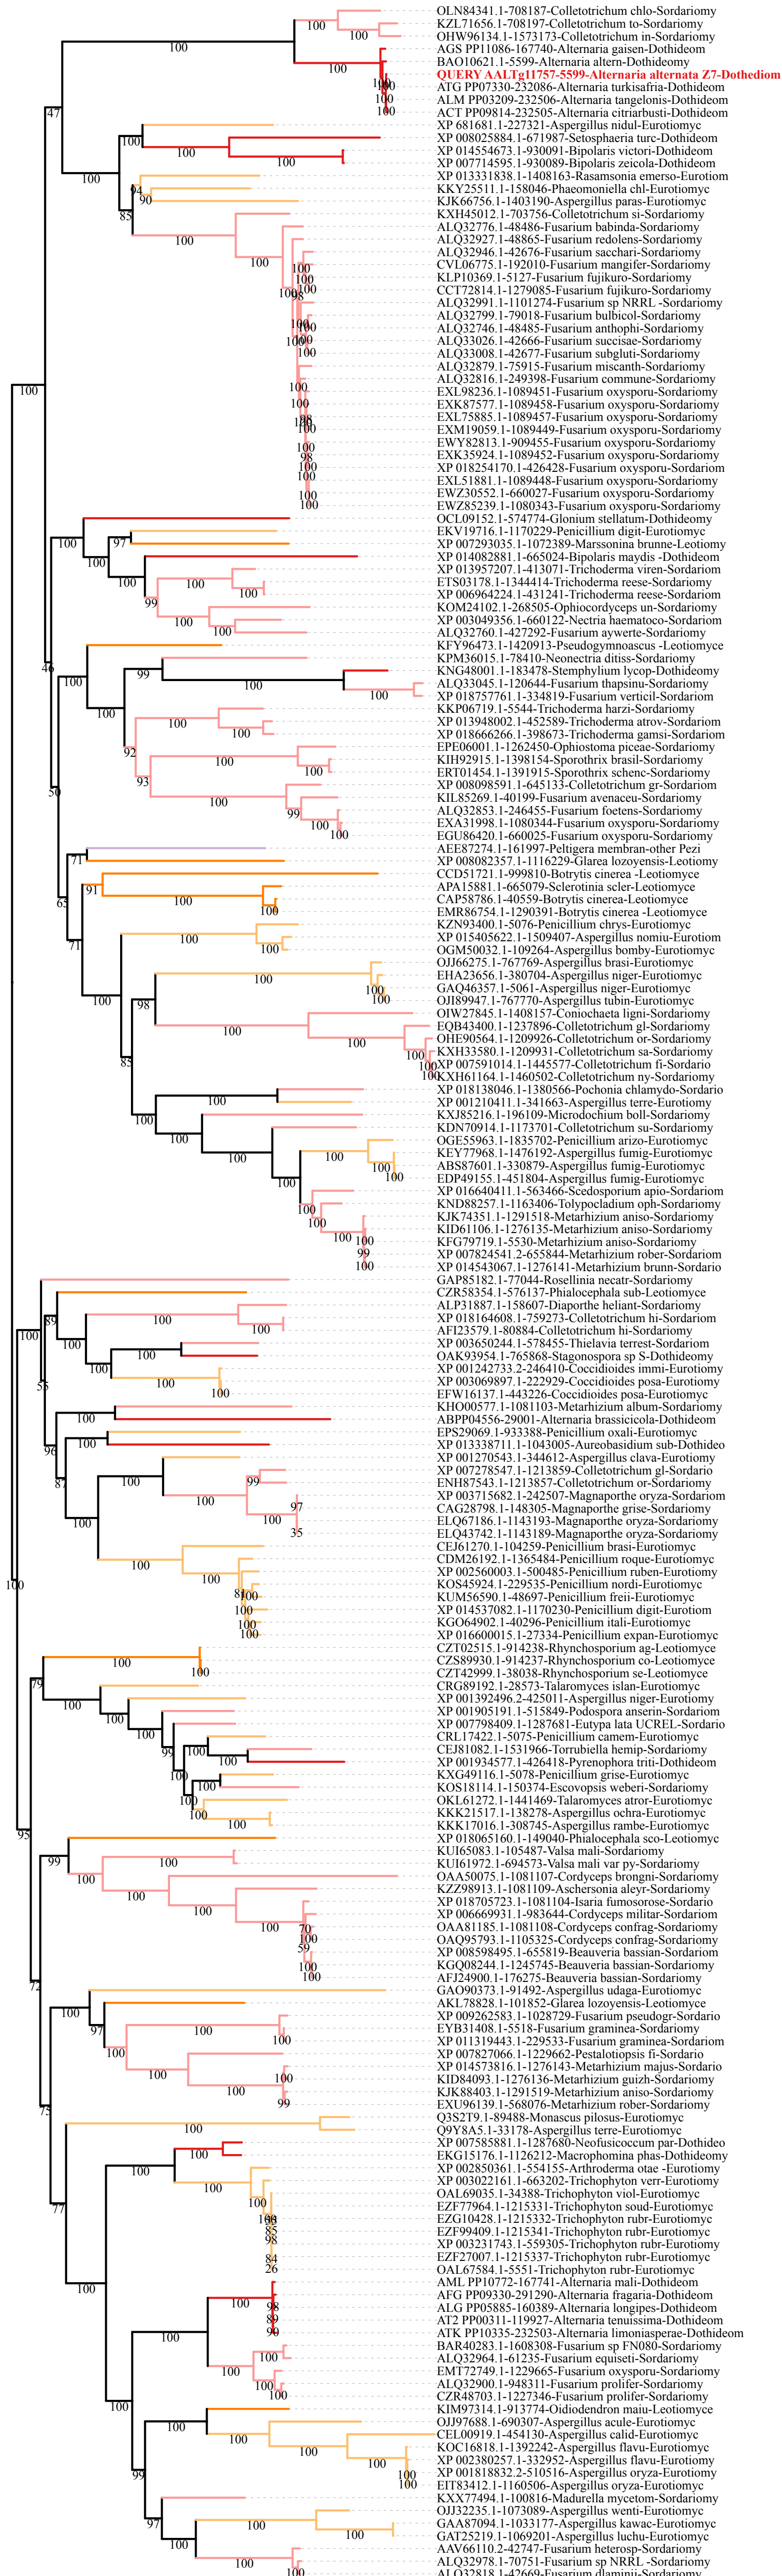

Supplement: MPP-20-1425-s006.pdf [file MPP-20-1425-s006.pdf]

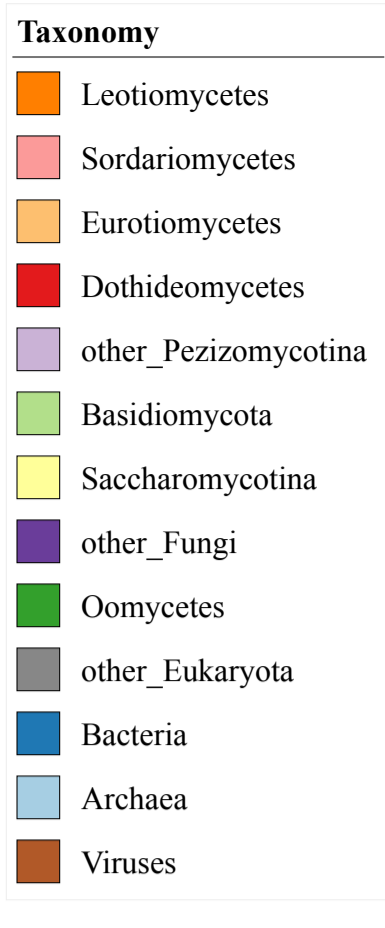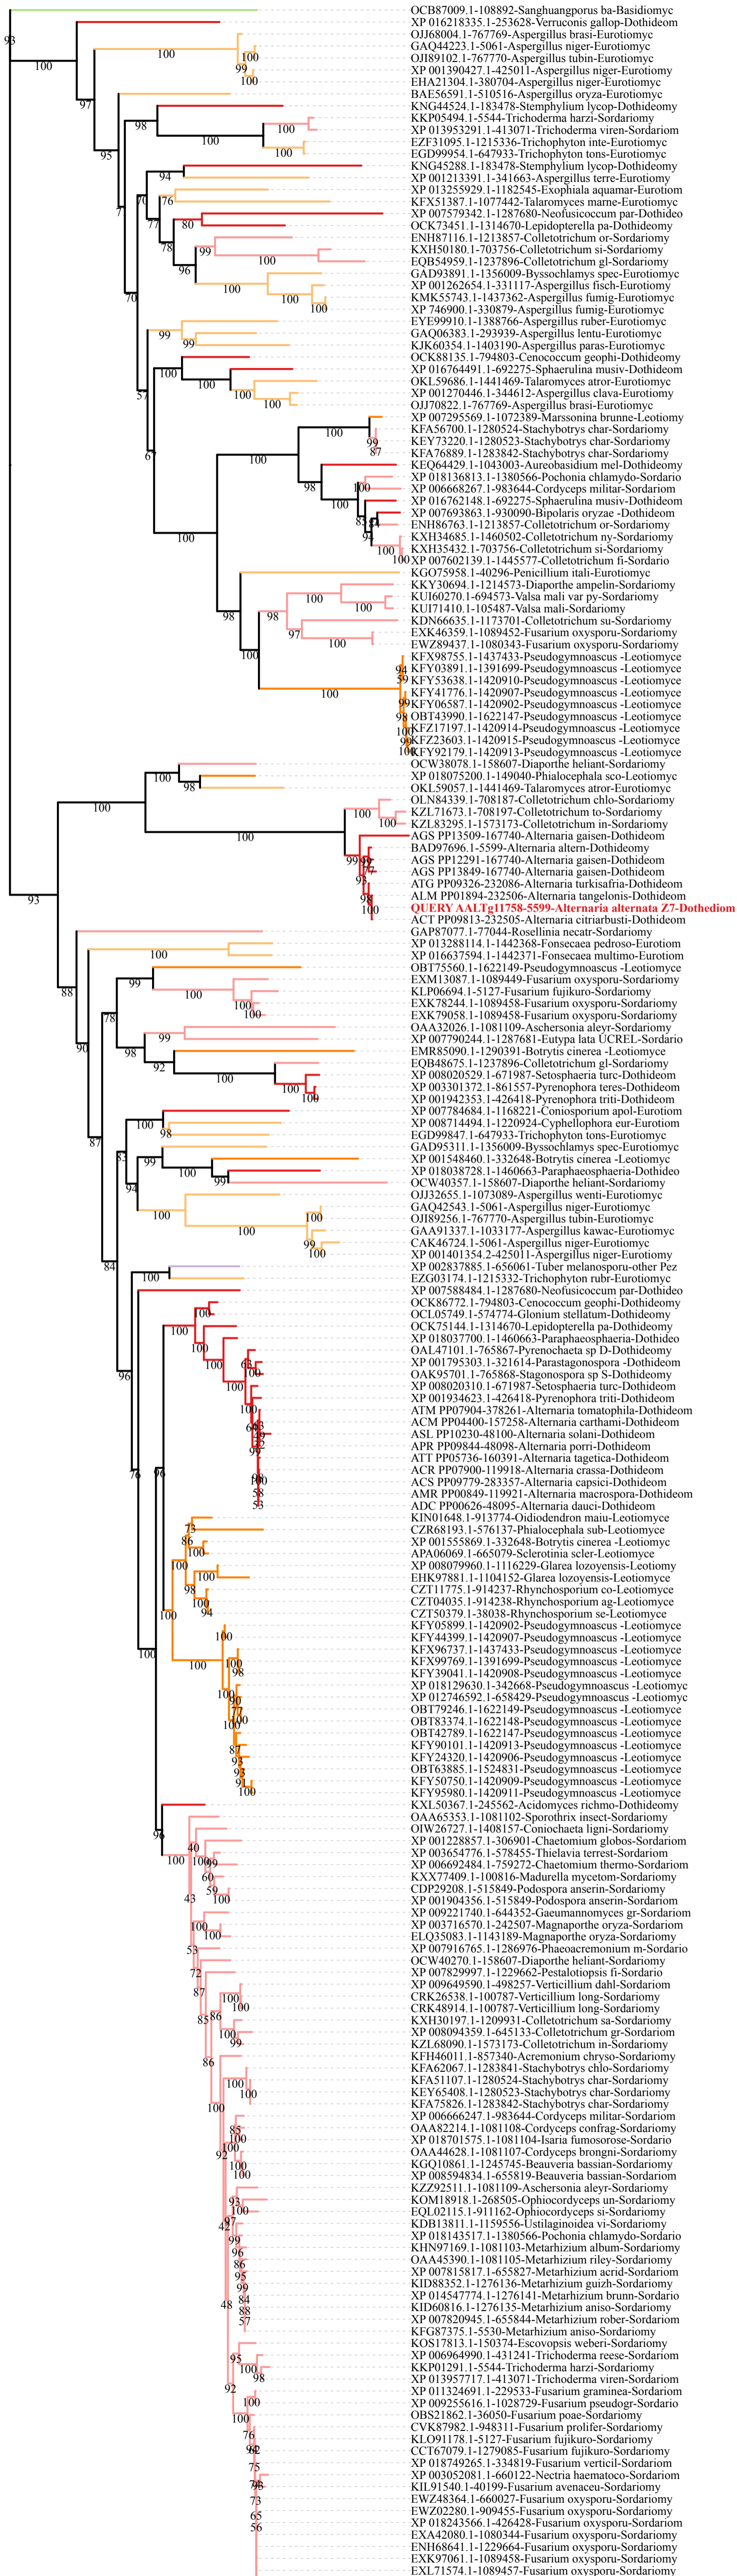

Fig S5

Supplement: MPP-20-1425-s007.pdf [file MPP-20-1425-s007.pdf]

**Fig S6**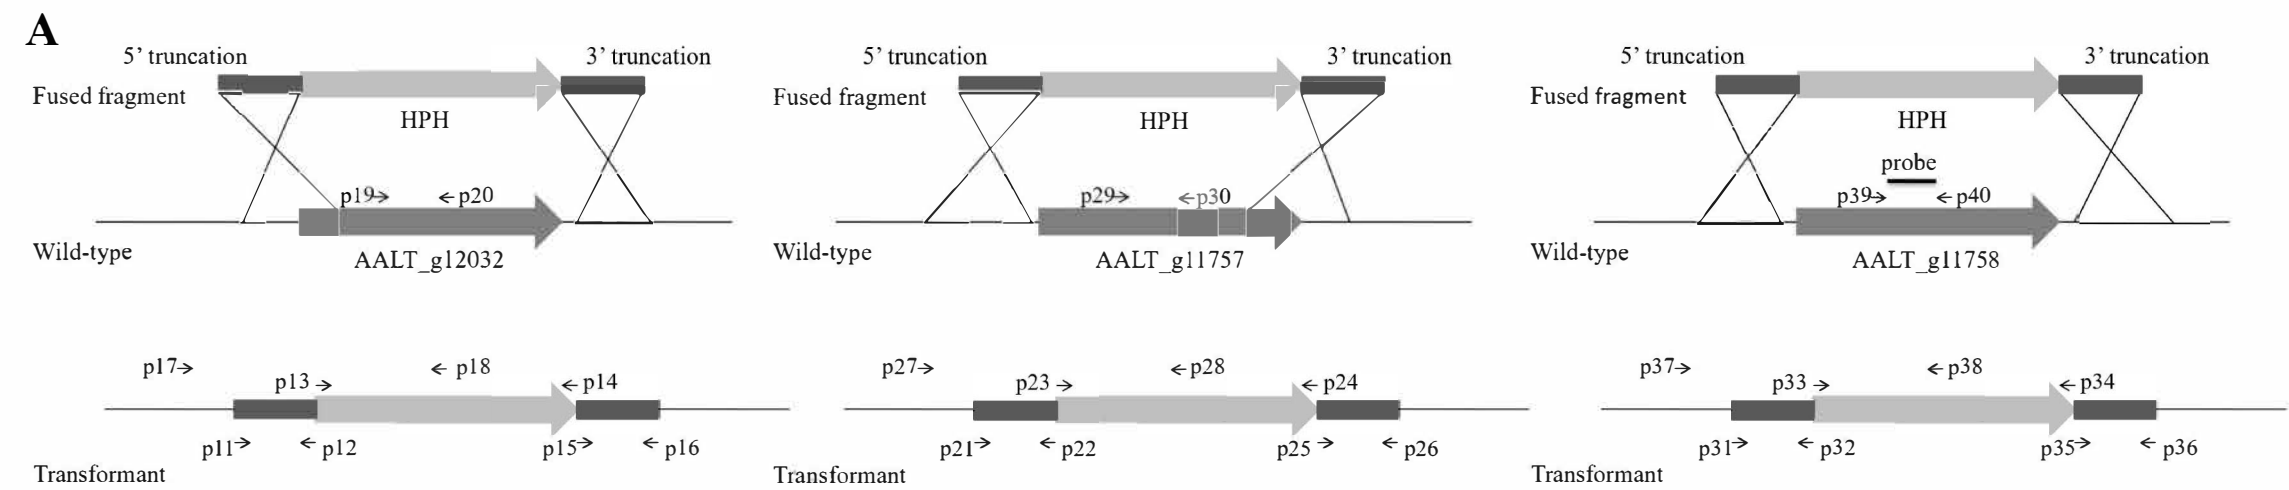**B**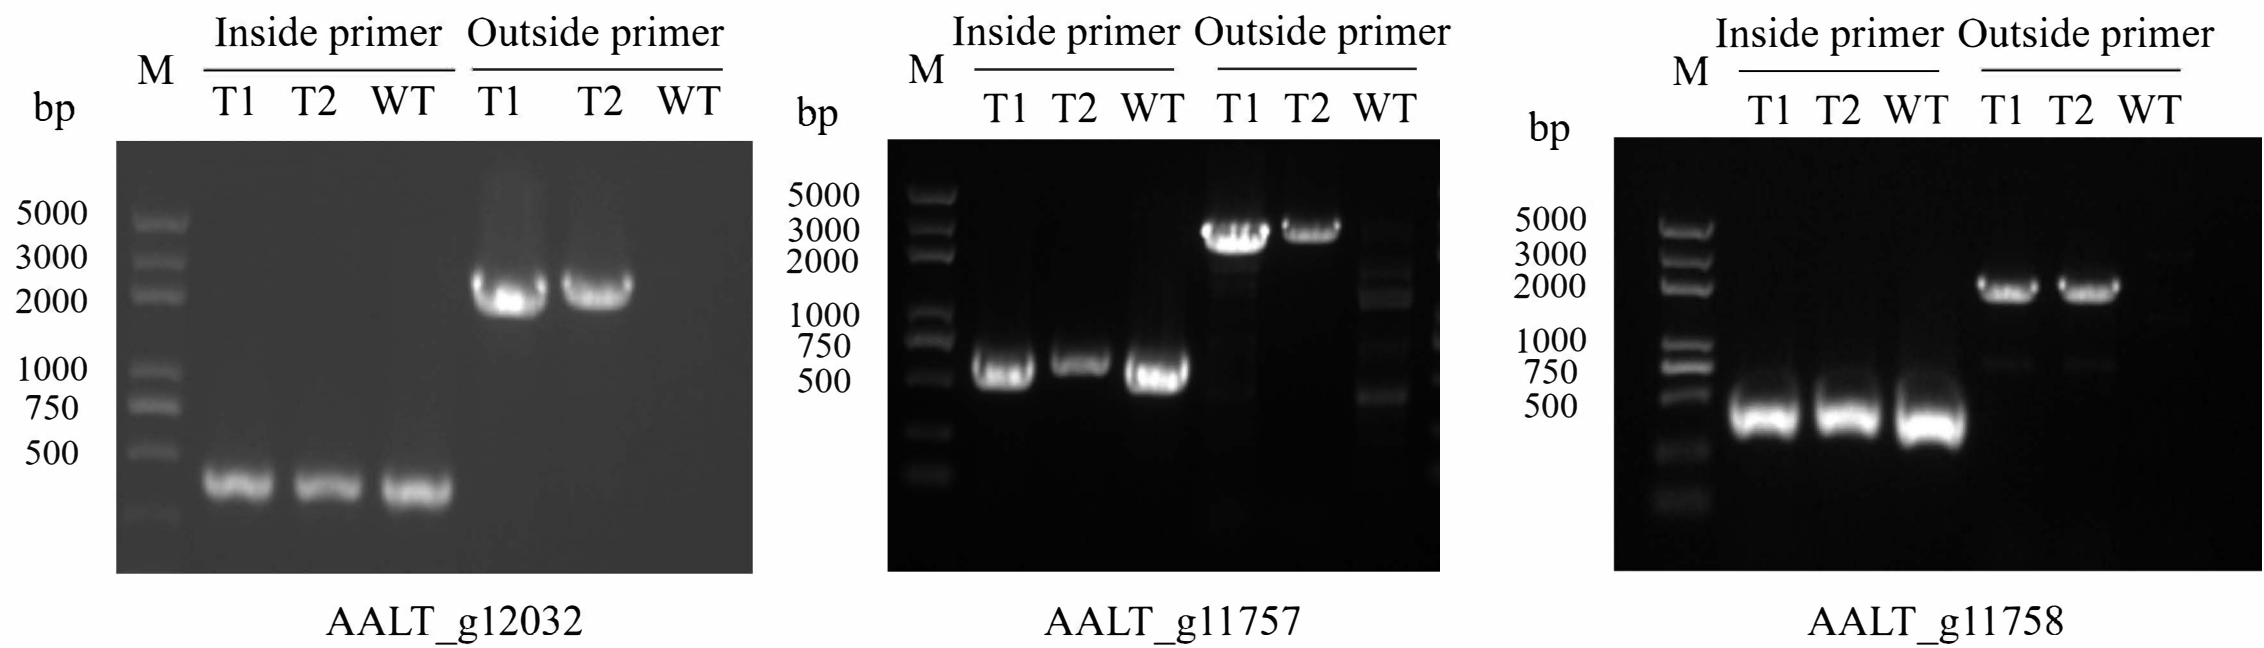**C**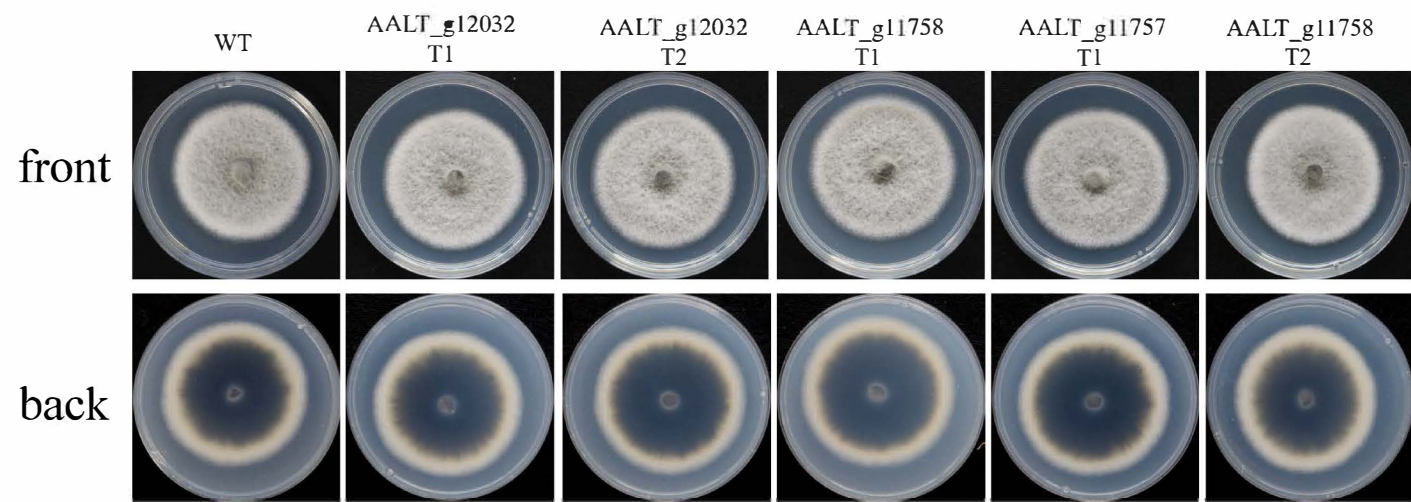**D**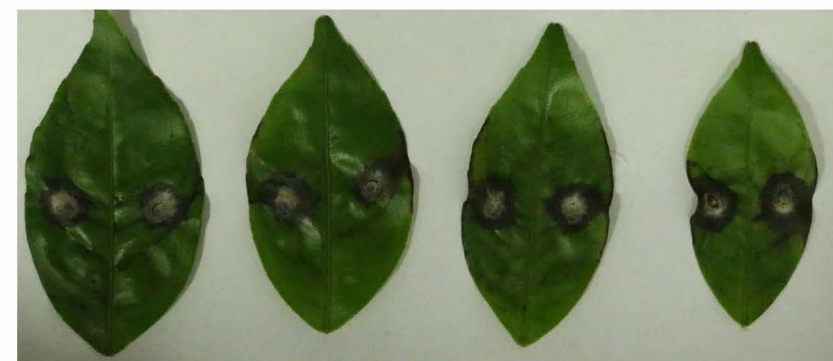

Supplement: MPP-20-1425-s008.pdf [file MPP-20-1425-s008.pdf]
